# Supplementary material for: Metabolic Profiling, a Noninvasive Approach for the Detection of Experimental Colorectal Neoplasia
Source: Oxford University Press journal article supplement (doi:10.1158/1940-6207.capr-12-0160), 2012-09-08
Supplement: 19406207capr120160-sup-t1_39k.pdf [file 19406207capr120160-sup-t1_39k.pdf]

Supplementary Table 1. Gene expression levels were determined in tumor tissue and normal colorectal mucosa by quantitative real-time PCR. Expression levels were calculated as relative expression compared to normal tissue for each gene and are reported as an average  $\pm$  standard deviation. The p-value was determined by the nonparametric Wilcoxon rank-sum test (n=8-12/group).

|       | <b>Normal</b> | <b>Tumor</b>  | <b>p value</b> |
|-------|---------------|---------------|----------------|
| PHGDH | 1.1 $\pm$ 0.3 | 8.4 $\pm$ 2.1 | <0.001         |
| PSAT1 | 1.0 $\pm$ 0.3 | 7.1 $\pm$ 1.7 | <0.001         |
| PSPH  | 1.0 $\pm$ 0.1 | 1.5 $\pm$ 0.2 | <0.001         |
| DMGDH | 1.1 $\pm$ 0.4 | 2.8 $\pm$ 1.8 | 0.008          |
| SARDH | 1.1 $\pm$ 0.4 | 0.8 $\pm$ 0.2 | 0.024          |
| GNMT  | 1.0 $\pm$ 0.3 | 1.6 $\pm$ 0.6 | 0.002          |
