# Supplementary material for: Metabolic Profiling, a Noninvasive Approach for the Detection of Experimental Colorectal Neoplasia
Source: Oxford University Press journal article supplement (doi:10.1158/1940-6207.capr-12-0160), 2012-09-08
Supplement: 19406207capr120160-sup-t2_68k.pdf [file 19406207capr120160-sup-t2_68k.pdf]

Supplementary Table 2. The identity and effect size of changes (AOM vs. saline-treated mice) based on log transformed data are shown for biochemicals whose changes are significant in feces and colorectum, plasma and colorectum and all 3 matrices, 7 weeks after the last injection.

| Biochemical Name                   | Effect Size |            | Biochemical Name                    | Effect Size |            | Biochemical Name         | Effect Size |        |            |
|------------------------------------|-------------|------------|-------------------------------------|-------------|------------|--------------------------|-------------|--------|------------|
|                                    | Feces       | Colorectum |                                     | Plasma      | Colorectum |                          | Feces       | Plasma | Colorectum |
| N-acetylaniline                    | 1.5         | 3.2        | N-acetylmethionine                  | 1.7         | 3.9        | gamma-glutamylmethionine | 3.9         | 1.9    | 2.1        |
| 3-(4-hydroxyphenyl)lactate         | 1.6         | 2.0        | dimethylglycine                     | 3.1         | 4.4        | N-acetylmethionine       | 4.8         | 1.7    | 3.9        |
| glycine                            | 2.2         | 3.8        | 2-hydroxyglutarate                  | 1.8         | 3.7        | inosine                  | -1.9        | -7.8   | -2.3       |
| sarcosine (N-Methylglycine)        | 2.4         | 1.9        | gamma-glutamylmethionine            | 1.9         | 2.1        |                          |             |        |            |
| alpha-hydroxyisovalerate           | 3.6         | 1.8        | 1,5-anhydroglucitol (1,5-AG)        | -3.1        | -2.5       |                          |             |        |            |
| N-acetylmethionine                 | 4.8         | 3.9        | nicotinamide                        | -2.4        | -2.7       |                          |             |        |            |
| tryptophan                         | 4.9         | 2.2        | alpha-tocopherol                    | -2.2        | -1.8       |                          |             |        |            |
| maltose                            | 3.0         | 2.0        | arachidonate (20:4n6)               | -4.2        | -2.7       |                          |             |        |            |
| gamma-glutamylleucine              | 3.0         | 2.2        | glycerophosphorylcholine (GPC)      | -3.0        | -4.6       |                          |             |        |            |
| gamma-glutamylmethionine           | 3.9         | 2.1        | glycerol 3-phosphate (G3P)          | -2.9        | -3.6       |                          |             |        |            |
| deoxycarnitine                     | -3.1        | -4.3       | 2-arachidonoylglycerophosphocholine | -2.9        | -4.3       |                          |             |        |            |
| docosapentaenoate (n6 DPA; 22:5n6) | -1.9        | -2.4       | propionylcarnitine                  | -2.0        | -3.0       |                          |             |        |            |
| pentadecanoate (15:0)              | -1.4        | -3.3       | inosine                             | -7.8        | -2.3       |                          |             |        |            |
| inosine                            | -1.9        | -2.3       | adenosine 5'-monophosphate (AMP)    | -1.8        | -2.6       |                          |             |        |            |
| isoleucylisoleucine                | -7.4        | -3.2       |                                     |             |            |                          |             |        |            |
| valylisoleucine                    | -5.9        | -2.1       |                                     |             |            |                          |             |        |            |
| alanylisoleucine                   | -5.8        | -1.9       |                                     |             |            |                          |             |        |            |
| isoleucylleucine                   | -4.5        | -2.1       |                                     |             |            |                          |             |        |            |
| leucylglycine                      | -4.1        | -1.7       |                                     |             |            |                          |             |        |            |
| isoleucylalanine                   | -3.9        | -2.3       |                                     |             |            |                          |             |        |            |
| valylleucine                       | -3.4        | -1.9       |                                     |             |            |                          |             |        |            |
| isoleucylphenylalanine             | -3.1        | -2.3       |                                     |             |            |                          |             |        |            |
| tyrosylleucine                     | -2.8        | -2.0       |                                     |             |            |                          |             |        |            |
| serylleucine                       | -2.7        | -2.3       |                                     |             |            |                          |             |        |            |
| alanylleucine                      | -2.6        | -2.7       |                                     |             |            |                          |             |        |            |
| threonylleucine                    | -2.6        | -2.0       |                                     |             |            |                          |             |        |            |
| alanylphenylalanine                | -2.6        | -3.0       |                                     |             |            |                          |             |        |            |
| phenylalanylleucine                | -2.5        | -2.0       |                                     |             |            |                          |             |        |            |
| serylphenylalanine                 | -2.4        | -3.3       |                                     |             |            |                          |             |        |            |
| methionylisoleucine                | -2.2        | -2.3       |                                     |             |            |                          |             |        |            |
| methionylleucine                   | -2.0        | -2.6       |                                     |             |            |                          |             |        |            |
| threonylphenylalanine              | -1.9        | -3.0       |                                     |             |            |                          |             |        |            |
| phenylalanylserine                 | -1.8        | -2.0       |                                     |             |            |                          |             |        |            |
