# Supplementary figures and images for: Metabolic Profiling, a Noninvasive Approach for the Detection of Experimental Colorectal Neoplasia
Source: Oxford University Press journal article supplement (doi:10.1158/1940-6207.capr-12-0160), 2012-09-08

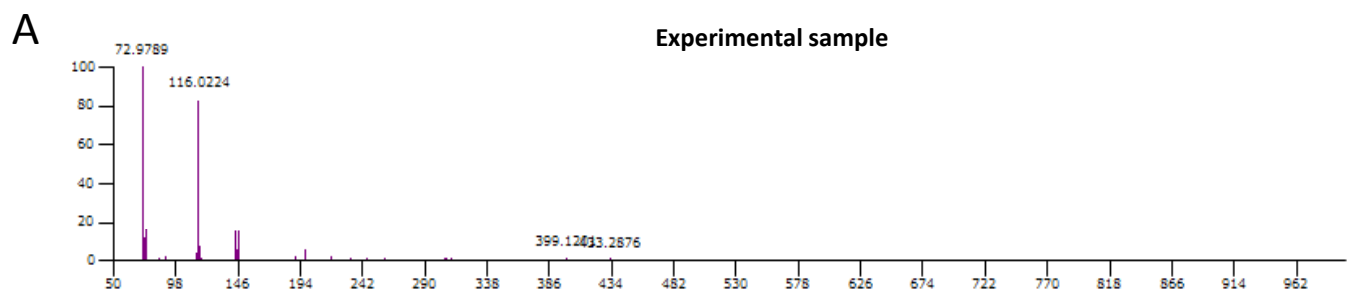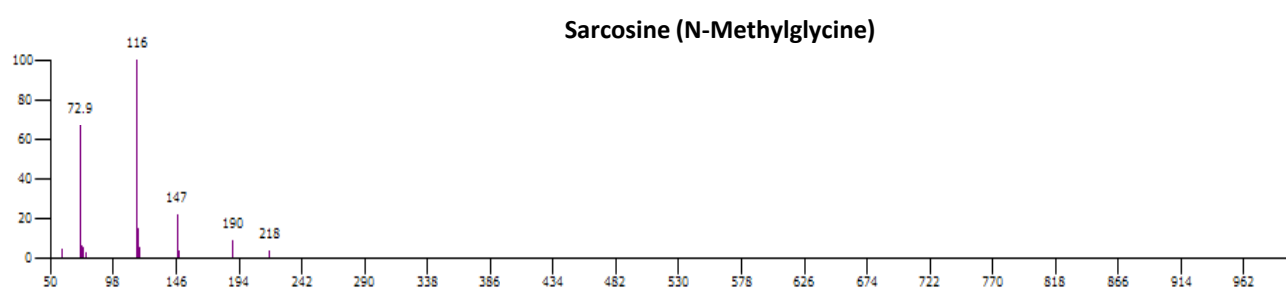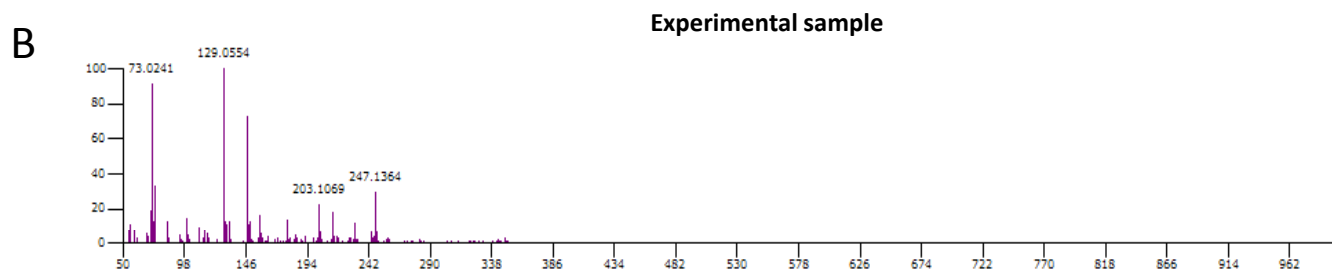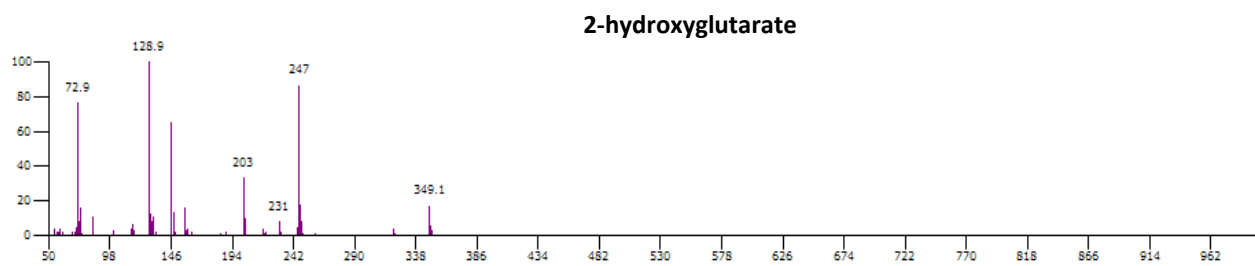

Supplementary Figure 1

Supplement: 19406207capr120160-sup-f1_48k.pdf [file 19406207capr120160-sup-f1_48k.pdf]

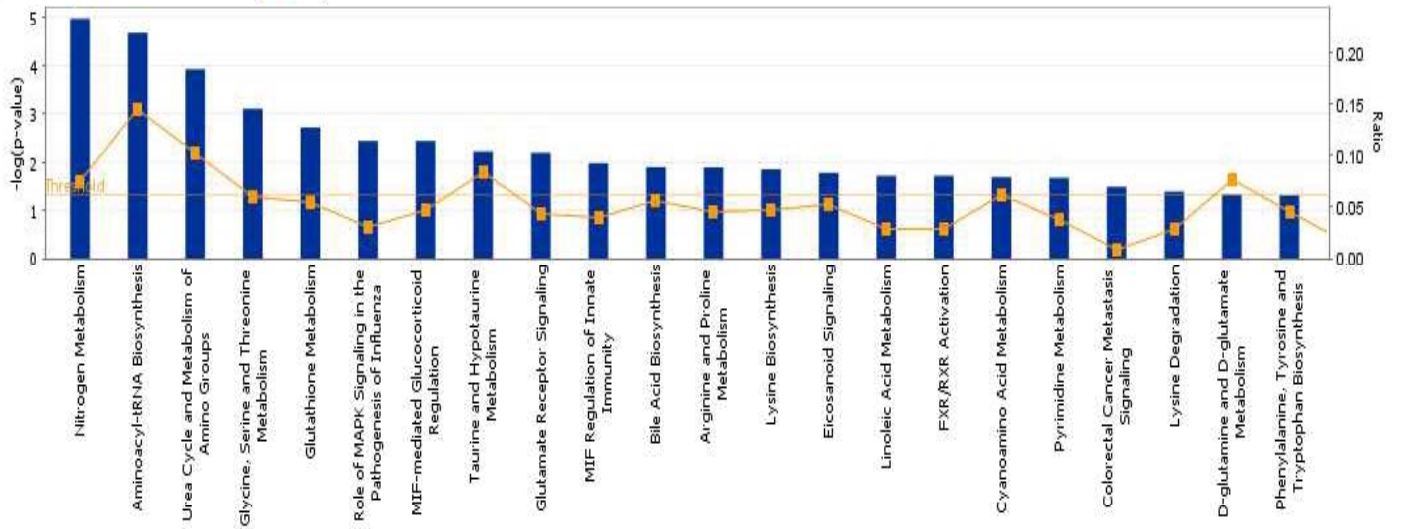

Supplementary Figure 2

Supplement: 19406207capr120160-sup-f2_102k.pdf [file 19406207capr120160-sup-f2_102k.pdf]
